# Kinetic Characterization of Exonuclease-Deficient *Staphylococcus aureus* PolC, a C-family Replicative DNA Polymerase

Indrajit Lahiri<sup>1,2</sup>\*, Purba Mukherjee<sup>1,2</sup>\*, Janice D. Pata<sup>1,2\*</sup>

**1** Wadsworth Center, New York State Department of Health, Albany, New York, United States of America, **2** Department of Biomedical Sciences, University at Albany School of Public Health, Albany, New York, United States of America

## Abstract

PolC is the C-family replicative polymerase in low G+C content Gram-positive bacteria. To date several structures of C-family polymerases have been reported, including a high resolution crystal structure of a ternary complex of PolC with DNA and incoming deoxynucleoside triphosphate (dNTP). However, kinetic information needed to understand the enzymatic mechanism of C-family polymerases is limited. For this study we have performed a detailed steady-state and pre-steady-state kinetic characterization of correct dNTP incorporation by PolC from the Gram-positive pathogen *Staphylococcus aureus*, using a construct lacking both the non-conserved N-terminal domain and the 3′–5′ exonuclease domain (*Sau*-PolC- $\Delta$ N $\Delta$ Exo). We find that *Sau*-PolC- $\Delta$ N $\Delta$ Exo has a very fast catalytic rate ( $k_{\text{pol}} 330 \text{ s}^{-1}$ ) but also dissociates from DNA rapidly ( $k_{\text{off}} \sim 150 \text{ s}^{-1}$ ), which explains the low processivity of PolC in the absence of sliding clamp processivity factor. Although *Sau*-PolC- $\Delta$ N $\Delta$ Exo follows the overall enzymatic pathway defined for other polymerases, some significant differences exist. The most striking feature is that the nucleotidyl transfer reaction for *Sau*-PolC- $\Delta$ N $\Delta$ Exo is reversible and is in equilibrium with dNTP binding. Simulation of the reaction pathway suggests that rate of pyrophosphate release, or a conformational change required for pyrophosphate release, is much slower than rate of bond formation. The significance of these findings is discussed in the context of previous data showing that binding of the  $\beta$ -clamp processivity factor stimulates the intrinsic nucleotide incorporation rate of the C-family polymerases, in addition to increasing processivity.

**Citation:** Lahiri I, Mukherjee P, Pata JD (2013) Kinetic Characterization of Exonuclease-Deficient *Staphylococcus aureus* PolC, a C-family Replicative DNA Polymerase. PLoS ONE 8(5): e63489. doi:10.1371/journal.pone.0063489

**Editor:** Giovanni Maga, Institute of Molecular Genetics IMG-CNR, Italy

**Received:** February 2, 2013; **Accepted:** April 3, 2013; **Published:** May 16, 2013

**Copyright:** © 2013 Lahiri et al. This is an open-access article distributed under the terms of the Creative Commons Attribution License, which permits unrestricted use, distribution, and reproduction in any medium, provided the original author and source are credited.

**Funding:** This work was supported by NIH grant R01-GM080573 to J.D.P. The funders had no role in study design, data collection and analysis, decision to publish, or preparation of the manuscript.

**Competing Interests:** The authors have declared that no competing interests exist.

\* E-mail: jpata@wadsworth.org

† These authors contributed equally to this work.

## Introduction

DNA replication is the complex process of genome duplication involving several different proteins that form the “replisome”. A key enzyme of the replisome is the DNA polymerase, a nucleotidyl transferase that catalyzes the addition of a deoxynucleoside triphosphate (dNTP) to the nascent DNA chain. All organisms have several types of DNA polymerases of which the ones responsible for duplicating most of the genome are known as replicative polymerases. These are characterized by being highly efficient enzymes that can select the next correct nucleotide with extraordinarily high accuracy in a template-dependent manner.

The replicative polymerases of all bacteria are grouped by sequence similarity into the C-family of DNA polymerases [1,2], but subdivide into two branches. The *polC* gene encodes the replicative polymerase of Gram-positive bacteria with low G+C content, while the *dnaE* gene encodes for the same in Gram-negative bacteria and in Gram-positive bacteria with high G+C content [3]. The replisomes of both Gram-positive and Gram-negative bacteria have been reconstituted and studied *in vitro* providing a wealth of knowledge about how replication occurs inside the bacterial cell [4–15].

Recently, several crystal structures of C-family polymerases have been reported, including DnaE from *Escherichia coli* and *Thermus aquaticus* and PolC from *Geobacillus kaustophilus* [16–19]. Other than non-conserved N- and C-terminal extensions, the individual domains of PolC and DnaE are structurally conserved [17], as expected from sequence conservation, but differ somewhat in their linear organization in the protein (Figure 1). The OB domain of PolC is located just after the non-conserved N-terminal domain, while the OB domain of DnaE is located just before the non-conserved C-terminal domain. Additionally, PolC contains an intrinsic 3′ to 5′ exonuclease proofreading domain that is absent in DnaE. In Gram-negative bacteria, this function is performed by the epsilon ( $\epsilon$ ) subunit [20] of the replisome, which is homologous to the PolC exonuclease domain. A remarkable finding from the crystallographic studies is that the bacterial replicative polymerases are not related to the replicative polymerases from either eukaryotes or the archaea.

Despite the fact that *in vitro* studies of the bacterial replisome have been key to delineating the main features of DNA replication in all forms of life [20], comparatively little is known about the kinetic mechanism of polymerization by C-family polymerases. This contrasts with the extensive kinetic information available for

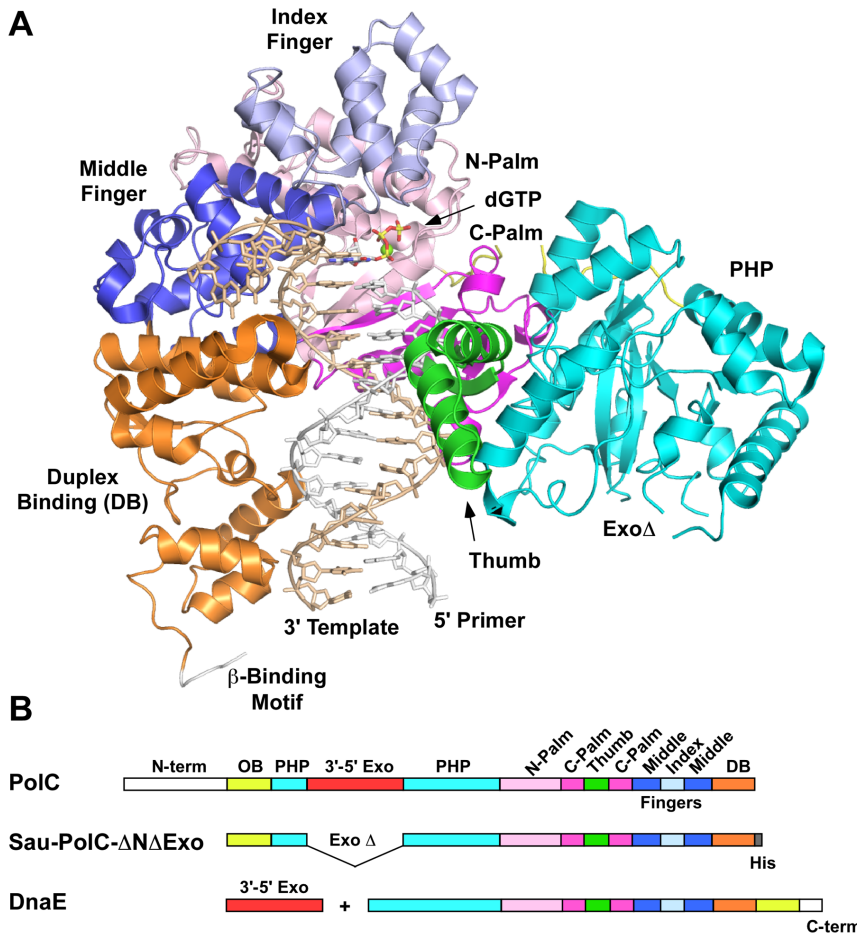

**Figure 1. Overview of PolC structure and domain organization.** A. Structure of *Gka*-PolC-ΔNΔExo shown (PDB ID: 3F2B). Domains are color coded as in Figure 1B. OB domain is not shown for simplicity. The linker connecting the N-palm and PHP domains is shown (yellow). B. Sequence alignment showing domain organization of C-family polymerases. doi:10.1371/journal.pone.0063489.g001

other polymerase families, including the B-family enzymes that are the replicative polymerases in eukaryotes and most archaea. Thus, the foundation for detailed structure-function studies of C-family polymerases has not yet been laid.

For all polymerases studied to date, the same overall enzymatic pathway (Figure 2) has been established for correct nucleotide incorporation [21–25]. The minimal pathway involves substrates binding to the polymerase in an ordered manner, with DNA binding first (step 1), followed by binding of the incoming dNTP (step 2). This is succeeded by the chemical step of bond formation (step 3). Typically, this step is preceded by a slower step along the pathway, which has been interpreted as a conformational change of the polymerase [21,23]. Earlier structural studies suggested that this slow step might correspond to the large-scale domain movement associated with nucleotide binding [26,27], but more recent studies have shown that motion to be too fast to be rate limiting [28,29]. Although the conformational change accompanying nucleotide binding is faster than chemistry, it still controls specificity of nucleotide addition [30,31]. Currently, the slower conformational change is thought to be a later, smaller-scale movement, but the precise nature of this non-covalent change is not known and may vary among different polymerases. Bond formation is followed by the release of the pyrophosphate (PP<sub>i</sub>) (step 4) generated during phosphoryl transfer. This step is generally presumed to be rapid [21] and is likely to be

accompanied by the reverse of the conformational change that is induced by dNTP binding. Finally, release of the product DNA occurs (step 5), allowing the polymerase to perform subsequent rounds of catalysis. During processive synthesis, DNA would translocate along the polymerase rather than dissociate.

In this study we have performed both steady-state and pre-steady-state kinetic characterization of correct dNTP incorpora-

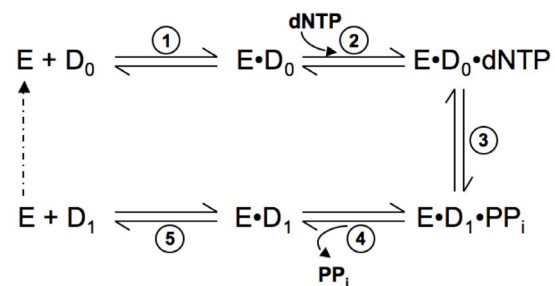

**Figure 2. Minimal single-nucleotide incorporation reaction pathway for DNA polymerases.** Abbreviations used were: E, DNA polymerase; D<sub>0</sub>, unextended DNA; D<sub>1</sub>, DNA extended by one base-pair; PP<sub>i</sub>, inorganic pyrophosphate. Dashed arrow indicates the polymerase entering another round of catalysis. doi:10.1371/journal.pone.0063489.g002

tion by an N-terminal and exonuclease domain deficient mutant of *Staphylococcus aureus* PolC (*Sau*-PolC- $\Delta$ N $\Delta$ Exo). This construct has the identical domain organization as the *G. kaustophilus* PolC used in the crystallographic study (*Gka*-PolC- $\Delta$ N $\Delta$ Exo) [17]. Furthermore, this construct has all the domains that are conserved between the PolC and DnaE polymerases (Figure 1). Hence, kinetic data obtained using this construct can be utilized directly for making structure-function correlations among the C-family polymerases and establish a foundation for future mechanistic studies of this polymerase family.

## Materials and Methods

### Materials

5'-6FAM labeled primer and unlabeled template oligonucleotides were purchased from Integrated DNA Technologies, Inc. Unlabeled ultrapure grade dTTP was purchased from GE Healthcare Biosciences. All the graphs and nonlinear regressions were done using GraphPad Prism, version 6.0a (GraphPad Software Inc.). Simulation of the reaction mechanism of *Sau*-PolC- $\Delta$ N $\Delta$ Exo was performed using KinTek Explorer, version 3.0 (KinTek Corp.) [32,33].

### Duplex DNA Formation

The primer and template DNA oligonucleotides were incubated together in annealing buffer (10 mM Tris-HCl (pH 8), 1 mM EDTA and 100 mM NaCl) and heated to a temperature of 95°C followed by gradual cooling to room temperature.

### Expression and Purification of *Sau*-PolC- $\Delta$ N $\Delta$ Exo

*S. aureus* PolC lacking the N-terminal domain (amino acids 1–207) and the exonuclease domain (amino acids 415–609) and containing a C-terminal hexahistidine tag (*Sau*-PolC- $\Delta$ N $\Delta$ Exo) was expressed from a pET32A vector and was a generous gift from Thale Jarvis (Crestone Inc.). The plasmid was transformed into Rosetta(DE3)pLysS *E. coli* cells. Cells were grown to an OD<sub>600</sub> of ~0.65 and then induced with 0.5 mM IPTG for ~16 hrs at 17°C. All subsequent steps were carried out at 4°C. Cell pellets were resuspended in IMAC buffer (50 mM Tris-HCl (pH 7.5), 800 mM NaCl, 10 mM imidazole and 10% glycerol). In order to prevent proteolytic degradation of *Sau*-PolC- $\Delta$ N $\Delta$ Exo, EDTA-free protease inhibitor tablet (Roche) was added to IMAC buffer at a concentration of 1 tablet/10 g of cells. Cells were lysed by sonication and the clarified cell lysate was passed through Ni-NTA columns (3×5 ml). In order to reduce the NaCl concentration to 100 mM for later steps, the columns were washed with 10 column volumes of low salt IMAC buffer (50 mM Tris-HCl (pH 7.5), 100 mM NaCl, 10 mM imidazole and 10% glycerol). The protein was eluted using a linear gradient of imidazole from 10 to 400 mM in low salt IMAC buffer. During elution, two proteins with molecular weights of ~75 kD eluted before *Sau*-PolC- $\Delta$ N $\Delta$ Exo. These are likely to be partial proteolytic products of *Sau*-PolC- $\Delta$ N $\Delta$ Exo and care was taken to remove these contaminants during elution from the Ni-NTA columns. Intact *Sau*-PolC- $\Delta$ N $\Delta$ Exo obtained from Ni-NTA chromatography was loaded onto Q-sepharose columns (HiTrap Q XL, 2×5 ml) pre-equilibrated in Buffer A (50 mM Tris-HCl (pH 7.5), 100 mM NaCl, 5 mM EDTA, 10% glycerol and 1 mM DTT). The protein was eluted from the Q column using a linear gradient of NaCl from 100 mM to 1 M in Buffer A. Eluent of the Q column was diluted ~7 fold in Buffer A, to a NaCl concentration of ~100 mM, and was subjected to heparin column chromatography (HiTrap Heparin HP, 2×5 ml). Buffer A was used to pre-equilibrate the heparin columns and protein was eluted using a linear gradient of NaCl

ranging from 100 mM to 1 M in Buffer A. As a final step of purification, *Sau*-PolC- $\Delta$ N $\Delta$ Exo eluted from the heparin column was subjected to size exclusion chromatography using a Superdex 200 column (HiLoad 16/60 Superdex 200 pg) pre-equilibrated in storage buffer (50 mM Tris-HCl (pH 7.5), 250 mM NaCl, 5 mM EDTA, 10% glycerol and 1 mM DTT). The purified protein obtained from the size exclusion column was concentrated to ~150–200  $\mu$ M, calculated from the OD<sub>280</sub> of the protein sample using a theoretical extinction coefficient of 87,100 M<sup>-1</sup>cm<sup>-1</sup>, and was stored at –80°C.

### Assays for Optimization of Enzymatic Activity of *Sau*-PolC- $\Delta$ N $\Delta$ Exo

Primer extension assays were performed in order to determine the optimum buffer conditions for the enzymatic activity of *Sau*-PolC- $\Delta$ N $\Delta$ Exo. 400 nM p/t DNA was incubated with 1 nM *Sau*-PolC- $\Delta$ N $\Delta$ Exo in PolC reaction buffer (25 mM MES-Tris (pH 8), 25 mM NaCl, 8 mM MgCl<sub>2</sub>, 2 mM DTT and 5% glycerol). All the components of the PolC reaction buffer were kept fixed except the component whose effect was being tested. Unless mentioned otherwise, all the assays were carried out at room temperature (25°C). Assays were initiated by addition of 1 mM (final concentration) dTTP to the reaction mix. After 2 minutes, an equal volume of 250 mM EDTA was added to quench the assays. The extended and unextended primers were separated on a 17% acrylamide/7 M urea denaturing 1xTBE gel. The gel was imaged using a Typhoon 9400 scanner (GE Healthcare) and bands were quantitated using ImageQuant software (GE Healthcare). Percentage of primer extension was determined by measuring the relative intensity of the band corresponding to the extended primer with respect to the total labeled DNA (i.e. both extended and unextended primer strands). All reactions were performed in triplicate.

### Steady-state Assays

Primer extension assays done for determining the steady-state parameters were performed using a KinTek RQF-3 rapid quench instrument (KinTek Corp.). Reactions were initiated by mixing a pre-equilibrated solution of 5  $\mu$ M p/t DNA and 50 nM total *Sau*-PolC- $\Delta$ N $\Delta$ Exo in PolC reaction buffer (this corresponded to an active enzyme concentration of 33 nM, as described in the “Active site titration” section of the Results) to an equal volume of various concentrations of dTTP (18.76 to 600  $\mu$ M) in the same buffer. Hence, the final p/t DNA and active *Sau*-PolC- $\Delta$ N $\Delta$ Exo concentrations in the reactions were 2.5  $\mu$ M and 16.5 nM respectively and the final concentration range of dTTP was 9.38 to 300  $\mu$ M. The assays were quenched at various time intervals by addition of 250 mM EDTA. The time intervals were adjusted such that primer extension was between 5–15%. Separation and quantitation of the extended primers was performed as described above. The concentration of primers extended for different concentrations of dTTP were plotted as a function of time and the data were fit to the steady-state rate equation:

$$Y = [ED]_A k_{obs} t + C \quad (1)$$

where Y is the concentration of primer extended, [ED]<sub>A</sub> is the concentration of active *Sau*-PolC- $\Delta$ N $\Delta$ Exo · p/t DNA binary complex that gets converted to product, k<sub>obs</sub> is the observed rate of primer extension, t is time interval after which the reaction was quenched, and C is a constant. The observed rates were plotted as a function of dTTP concentration ([dTTP]) and the data were fit to the Michaelis-Menten equation:

$$k_{obs} = \frac{k_{cat}[dTTP]}{K_M^{dNTP} + [dTTP]} \quad (2)$$

where  $k_{cat}$  is the maximum steady-state rate and  $K_M$  is the Michaelis constant for dNTP.

### Measurement of DNA Dissociation Rate from Binary Complex

Kintek RQF3 rapid quench device was used to perform this experiment. 300 nM *Sau*-PolC- $\Delta$ N $\Delta$ Exo (this corresponded to an active enzyme concentration of 200 nM, as described in the ‘‘Active site titration’’ section of the Results) was preincubated with 160 nM p/t DNA in PolC reaction buffer in a 16  $\mu$ l reaction volume. This was mixed with an equal volume of 96  $\mu$ M unlabelled p/t DNA in the same buffer and incubated for various time intervals (0.005–0.05 s). Finally,  $\sim$ 80  $\mu$ l of 200  $\mu$ M dTTP was added for primer extension ( $\sim$ 140  $\mu$ M final concentration). At this stage the reaction was allowed to proceed for 0.028 s and quenched by collection of the sample in a microfuge tube containing 100  $\mu$ l of 250 mM EDTA. Concentration of the extended primer was plotted as a function of time. Data were fit to the following exponential equation (Equation 3) and the rate of decrease of product formation was interpreted as the rate of dissociation of *Sau*-PolC- $\Delta$ N $\Delta$ Exo from the preformed *Sau*-PolC- $\Delta$ N $\Delta$ Exo  $\cdot$  p/t DNA binary complex

$$Y = Ae^{-kt} + C \quad (3)$$

where, Y is the concentration of the product formed, A is the amplitude, k is the rate of product formation, t is the first incubation time (ranging from 0.005 to 0.05 s) and C is a constant. Reactions were performed in triplicate.

### Active Site Titration of *Sau*-PolC- $\Delta$ N $\Delta$ Exo

300 nM *Sau*-PolC- $\Delta$ N $\Delta$ Exo was pre-equilibrated with various concentrations of p/t DNA (20 to 1800 nM) in PolC reaction buffer. The reactions were initiated by rapid mixing of this solution with an equal volume of PolC reaction buffer containing 2 mM dTTP in a KinTek RQF-3 rapid quench instrument. Final concentrations were 10–900 nM p/t DNA, 150 nM polymerase and 1 mM dTTP. The reactions were terminated at different time intervals by addition of 250 mM EDTA. The time-courses of primer extension for different p/t DNA concentrations were fit to the full burst equation:

$$Y = [ED]_A \left( \left( \frac{k_1}{k_1 + k_2} \right)^2 (1 - e^{-(k_1 + k_2)t}) + \left( \frac{k_1 k_2 t}{k_1 + k_2} \right) \right) + C \quad (4)$$

where Y is the concentration of the extended primer,  $[ED]_A$  is the concentration of the preformed active enzyme  $\cdot$  DNA binary complex that gets converted to product before turnover,  $k_1$  is the rate of the fast phase,  $k_2$  is the rate of the slow phase, t is the time interval after which the reaction was quenched and C is a constant.  $[ED]_A$  for different DNA concentrations thus obtained were plotted out as a function of p/t DNA concentration and fit to the following quadratic equation:

$$[ED]_A = \frac{(K_D^{DNA} + [E]_A + [DNA]_T) - \sqrt{(K_D^{DNA} + [E]_A + [DNA]_T)^2 - 4[E]_A[DNA]_T}}{2} \quad (5)$$

where  $K_D^{DNA}$  is the dissociation constant for binding of *Sau*-PolC- $\Delta$ N $\Delta$ Exo to p/t DNA,  $[E]_A$  is the concentration of active *Sau*-PolC- $\Delta$ N $\Delta$ Exo and  $[DNA]_T$  is the concentration of total p/t DNA at the beginning of the assay.

### $K_D^{dNTP}$ Determination

Primer extension assays were performed with a RQF-3 rapid quench instrument using final concentrations of 804 nM active *Sau*-PolC- $\Delta$ N $\Delta$ Exo, 50 nM p/t DNA and various  $[dTTP]$  (1.17 to 100  $\mu$ M). Reactions were quenched by addition of 250 mM EDTA. Time courses of primer extension reactions were plotted as a function of  $[dTTP]$  and the data were fit to the full burst equation (Equation 4). The rate,  $k_1$ , and  $[ED]_A$  thus obtained were further plotted against  $[dTTP]$  and then fit to the appropriate hyperbolic equation:

$$k_1 = \frac{k_{pol}[dTTP]}{K_D^{dNTP} + [dTTP]} \quad (6)$$

$$[ED]_A = \frac{[ED]_A^{max}[dTTP]}{K_D^{dNTP} + [dTTP]} \quad (7)$$

where  $k_{pol}$  is the maximum rate of the burst of product formation,  $K_D^{dNTP}$  is the dissociation constant for dNTP binding to the *Sau*-PolC- $\Delta$ N $\Delta$ Exo  $\cdot$  p/t DNA binary complex and  $[ED]_A^{max}$  is the maximum concentration of the enzyme  $\cdot$  DNA binary complex that gets converted to product before turnover.

Unless mentioned otherwise, all reactions were done in at least three independent experiments, using two different preparations of *Sau*-PolC- $\Delta$ N $\Delta$ Exo. All data were combined and analyzed together.

### Simulation

The reaction mechanism of *Sau*-PolC- $\Delta$ N $\Delta$ Exo was simulated using KinTek Explorer software. Details about the mechanism used for the simulation is discussed under ‘‘Results’’ section. The software was used to fit data to the simulation using an iterative procedure until a ‘‘best fit’’ was achieved. The simulated curves and the raw data were exported from the software and final plots overlaying the raw data with the simulated curves were prepared using GraphPad Prism. To determine the range within which each of the rate constants was constrained by the model, and to investigate the relationships between different rate constants, we computed 3-D confidence contour plots for all possible pairs of rate constants. See reference [32] for a detailed description of how to interpret these plots.

## Results

### PolC Purification

Recombinant *Sau*-PolC- $\Delta$ N $\Delta$ Exo was purified using Ni-NTA, anion exchange, heparin and size-exclusion chromatography. Figure 3 shows SDS-PAGE analysis of the final purified protein. *Sau*-PolC- $\Delta$ N $\Delta$ Exo migrates as expected for a protein with a theoretical molecular weight of 120 kD. As has been noted previously for full-length PolC [12], inducing protein expression at

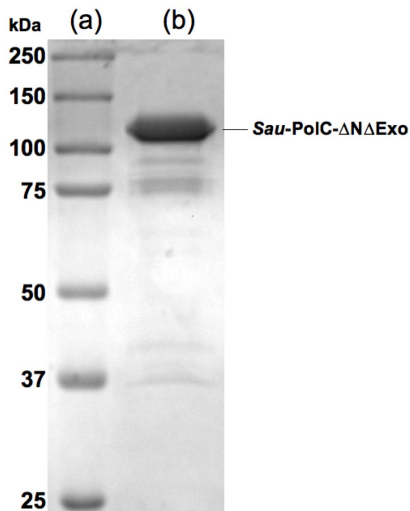

**Figure 3. SDS-PAGE of *Sau-PolC-ΔNΔExo*.** A 10% SDS-polyacrylamide gel stained with Coomassie R-250 showing purified *Sau-PolC-ΔNΔExo* obtained after size exclusion chromatography. (a) Kaleidoscope pre-stained marker. (b) 2.5  $\mu\text{M}$  purified *Sau-PolC-ΔNΔExo*. doi:10.1371/journal.pone.0063489.g003

temperatures below 20°C was critical for obtaining purified protein, estimated to be ~95% homogeneous, that did not have significant levels of proteolytic products.

### Optimal Reaction Conditions

Reaction conditions for *Sau-PolC-ΔNΔExo* were optimized by quantitating incorporation of the next correct dNTP on a p/t DNA with an 18-bp duplex region and a 19-nt single stranded template region (Figure 4A). All reaction conditions were kept constant, except for the one whose effect was being tested. The reaction conditions varied were: pH of the buffer, concentration of NaCl, concentration of  $\text{Mg}^{2+}$  and reaction temperature (Figure 4B–E). Dependence of primer extension on the buffer pH followed a bell shaped curve typical of an acid-base reaction, with an optimum pH of 8 (Figure 4B). The rate of primer extension was found to decrease with an increase in the concentration of NaCl, with the maximum activity occurring at 25 mM NaCl (Figure 4C). A concentration of 8 to 12 mM  $\text{Mg}^{2+}$  was found to be optimal for enzymatic activity of *Sau-PolC-ΔNΔExo* (Figure 4D). No primer extension was observed in the absence of  $\text{Mg}^{2+}$ , as expected for a polymerase using a two-metal-ion mechanism. Very little primer extension occurred at 4°C and 50°C, but, for all other temperatures tested (25°C, 30°C and 37°C), the enzyme performed well (Figure 4E). Based on these results, all subsequent reactions were performed at 25°C at pH 8 with 25 mM NaCl and 8 mM  $\text{Mg}^{2+}$ .

### Michaelis-Menten Kinetics

Primer extension assays were performed under steady-state conditions, with substrates present in excess of enzyme, using a final concentration of 2.5  $\mu\text{M}$  p/t DNA, 16.5 nM active *Sau-PolC-ΔNΔExo* (see result of “Active site titration” for calculation of active enzyme concentration) and various concentrations of dTTP ranging from 9.38 to 300  $\mu\text{M}$ . Observed rates of nucleotide incorporation were calculated from the concentration of product formed vs. time, using the linear portion of progress curves (Figure 5A), and were plotted as a function of [dTTP] (Figure 5B). The data were fit to the Michaelis-Menten equation (Equation 2) and gave a  $k_{\text{cat}}$  of  $17 \pm 1 \text{ s}^{-1}$  and  $K_{\text{M}}^{\text{dTTP}}$  of  $43 \pm 7 \mu\text{M}$ .

### Rate of Dissociation of p/t DNA from the Binary Complex

Typically, in single-nucleotide incorporation assays such as the one used here, dissociation of the DNA from the polymerase · DNA binary complex is the rate limiting step of the catalytic cycle, and the rate of this step ( $k_{\text{off}}$ ) governs the steady-state rate ( $k_{\text{cat}}$ ). To determine if this was the case for *Sau-PolC-ΔNΔExo*, we directly measured  $k_{\text{off}}$  using the experimental design shown in Figure 6A. For this experiment *Sau-PolC-ΔNΔExo* was preincubated with p/t DNA and the preformed *Sau-PolC-ΔNΔExo* · p/t DNA binary complex was rapidly mixed with an equal volume of unlabelled p/t DNA. The resulting reaction (containing final concentrations of 150 nM *Sau-PolC-ΔNΔExo*, 80 nM p/t DNA, and 48  $\mu\text{M}$  unlabelled p/t DNA) was incubated for various time intervals ranging from 0.005 to 0.05 s. The unlabelled p/t DNA trapped any *Sau-PolC-ΔNΔExo* that dissociated from the preformed binary complex during this time. Next, dTTP was added to initiate the reaction and a further incubation of 0.028 s was performed, to allow extension of p/t DNA bound to PolC. Finally, the reaction was quenched with EDTA. A plot of labeled product formed versus the variable incubation time (0.005 to 0.05 s) showed a clear reduction in product concentration with increasing time (Figure 6B). This was attributed to the decrease in the concentration of the preformed *Sau-PolC-ΔNΔExo* · p/t DNA due to the dissociation of the labeled p/t DNA from the complex and rebinding of the enzyme to the excess unlabeled p/t DNA. The data fitted well to an exponential equation (Equation 3) and the rate of decrease in product formation ( $k_{\text{off}}$ ) was found to be  $150 \pm 30 \text{ s}^{-1}$ . This indicated that for *Sau-PolC-ΔNΔExo*, DNA dissociation is approximately 9-fold faster than  $k_{\text{cat}}$  and, surprisingly, is not the rate-limiting step of the of the single-nucleotide incorporation cycle.

### Pre-steady-state Burst Kinetics

To determine if *Sau-PolC-ΔNΔExo* displayed a rate-limiting step after chemistry, primer extension assays were performed under pre-steady-state conditions with a total enzyme concentration of 150 nM and 80 nM p/t DNA (final concentrations). After pre-incubation to form the binary complex, reactions were started by the addition of dTTP to a final concentration of 35  $\mu\text{M}$  and product formation was followed up to 0.2 s. Plot of the concentration of product formed with respect to time was biphasic in nature (Figure 7A). The fast phase represents the initial burst of dTTP incorporation by the pre-formed *Sau-PolC-ΔNΔExo* · p/t DNA binary complex, while the slow phase represents dTTP incorporation in subsequent rounds of primer extension, after the enzyme dissociates from the first p/t DNA substrate and rebinds another. The data were fit using the full burst equation (Equation 4) [34]. The rates of the fast and slow phases obtained were  $150 \pm 30 \text{ s}^{-1}$  and  $8.5 \pm 1 \text{ s}^{-1}$ , respectively. Product formed during the fast burst phase was  $12 \pm 1 \text{ nM}$ , indicating that out of 150 nM of *Sau-PolC-ΔNΔExo*, only 12 nM formed active enzyme · DNA binary complex that got converted to product.

Since the rate of dissociation of the DNA substrate from the binary complex (Figure 2, step 5) was very fast, it was possible that the DNA did not form a stable ternary complex even in the presence of the correct incoming dNTP (Figure 2, step 3). In order to test whether such was the case, we repeated the above burst experiment in the presence of 48  $\mu\text{M}$  of unlabelled p/t DNA that was added at the same time as the dTTP. Any *Sau-PolC-ΔNΔExo* that dissociated from the labeled p/t DNA would be trapped by the excess unlabelled DNA, which would eliminate the slower phase. Additionally, any unstable ternary complex having a dissociation rate comparable to the rate of chemistry or faster would result in lower amplitude of product formation in the



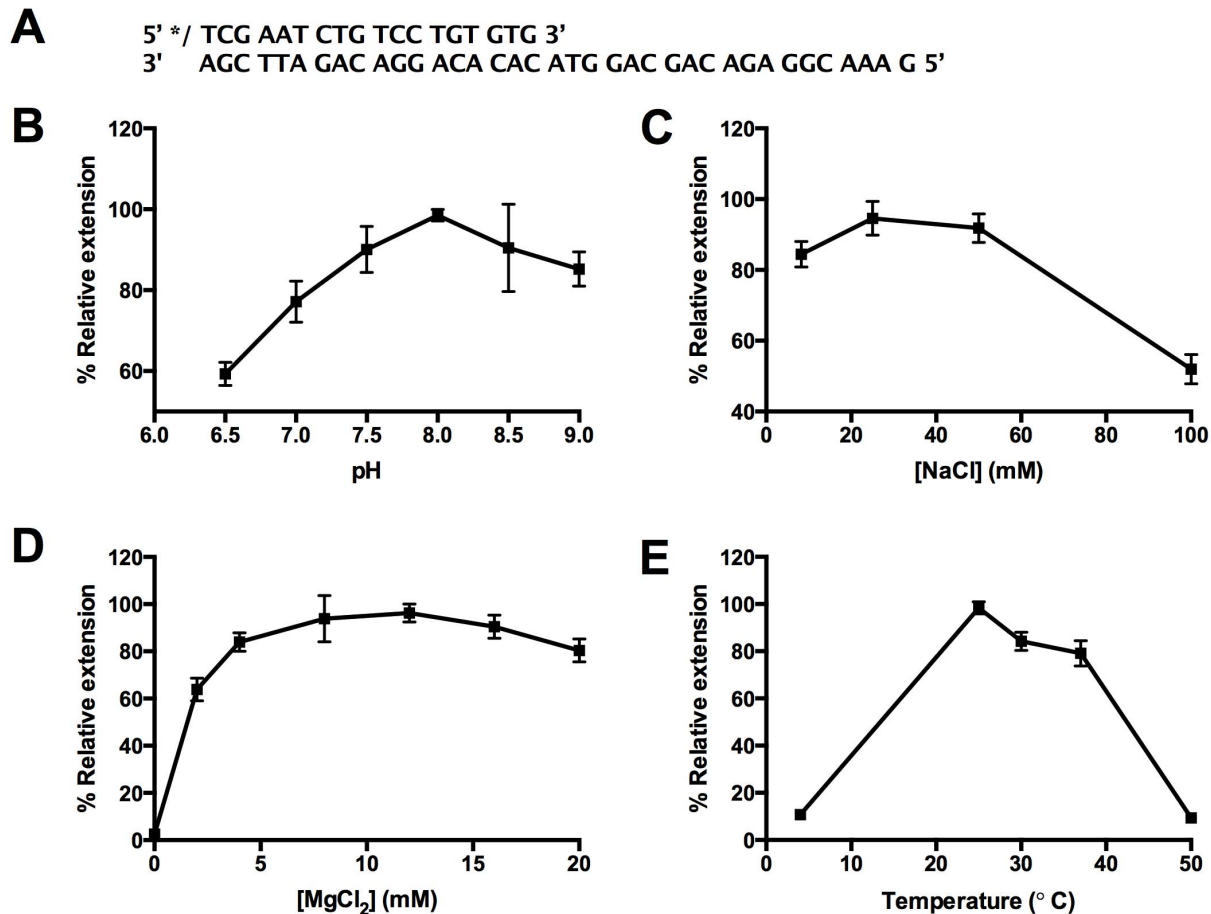

**Figure 4. Primer extension assays for optimizing enzymatic activity of *Sau*-PolC- $\Delta$ N $\Delta$ Exo.** (A) Duplex DNA sequence used for all primer extension assays performed in this study. "\*" at 5' end of primer indicates 6-FAM label. (B) Effect of pH (C) Effect of NaCl concentration (D) Effect of Mg<sup>2+</sup> concentration and (E) Effect of temperature on *Sau*-PolC- $\Delta$ N $\Delta$ Exo activity. Primer extension assays were carried out under steady-state conditions by adding 1 mM dTTP (the correct incoming dNTP) to a pre-incubated solution of 400 nM p/t DNA and 1 nM *Sau*-PolC- $\Delta$ N $\Delta$ Exo. Reactions were quenched after 2 minutes by addition of an equal volume of 250 mM EDTA. Unextended and extended primers were separated by gel electrophoresis on a 17% denaturing TBE-acrylamide gel. Fraction of primer DNA extended was determined by measuring the relative intensity of the extended primer band with respect to the total labeled DNA (extended and unextended primer). doi:10.1371/journal.pone.0063489.g004

presence of the trap. Our result shows that, in the presence of the DNA trap, the slow phase was eliminated, as expected, and the amplitude of product formation was  $11.5 \pm 0.5$  nM (Figure 7A), identical to the amplitude in the absence of the trap.

These results indicate that although DNA dissociation from the binary complex is rapid, disassembly of the ternary complex is not rapid and, during a single nucleotide-incorporation cycle, DNA does not dissociate from the enzyme after nucleotide binds. The difference in the rates of product formation for the first and subsequent rounds of enzyme turnover, as observed in the burst experiment, indicates the presence of a slow and at least partially rate-limiting step after dNTP incorporation. The low burst amplitude suggested that binding of *Sau*-PolC- $\Delta$ N $\Delta$ Exo to p/t DNA was weak and/or only a fraction of the enzyme was active. A third possibility is the presence of an internal equilibrium in the pathway leading to a reduction in product formation. The following experiments indicate that all three of these possibilities contribute to the low burst amplitude.

#### Active Site Titration

The formation of a stable ternary complex and the presence of a slow, rate-limiting step after chemistry allowed us to perform burst

kinetic assays to determine the apparent  $K_D^{\text{DNA}}$  and the concentration of active *Sau*-PolC- $\Delta$ N $\Delta$ Exo. For these assays, the final concentration of total *Sau*-PolC- $\Delta$ N $\Delta$ Exo was 150 nM and the final DNA concentration was varied between 10 and 900 nM. Product formation for a representative set of DNA concentrations is shown in Figure 7B. The time courses were fit to the full burst equation, and the concentrations of the initial active enzyme · DNA complex that was converted into product during the first round of catalysis ( $[ED]_A$ ), obtained from the amplitudes of the fast phase, were plotted as a function of DNA concentration (Figure 7C). The data were fit to a quadratic equation (Equation 5). From the fit, the apparent  $K_D^{\text{DNA}}$  was determined to be  $390 \pm 70$  nM, indicating a relatively weak binding to DNA (Table 1), and the concentration of active *Sau*-PolC- $\Delta$ N $\Delta$ Exo was  $100 \pm 8$  nM, implying that  $\sim 70\%$  of the *Sau*-PolC- $\Delta$ N $\Delta$ Exo was active. The active enzyme concentration was lower than expected given the purity of the preparation, but the result was consistent for different preparations. From the apparent DNA binding affinity and the rate of DNA dissociation, we estimate that *Sau*-PolC- $\Delta$ N $\Delta$ Exo associates with DNA with a rate constant ( $k_{\text{on}}$ ) of  $\sim 4 \times 10^8 \text{ M}^{-1} \text{ s}^{-1}$ , which suggests that the rate of DNA binding is limited by diffusion.

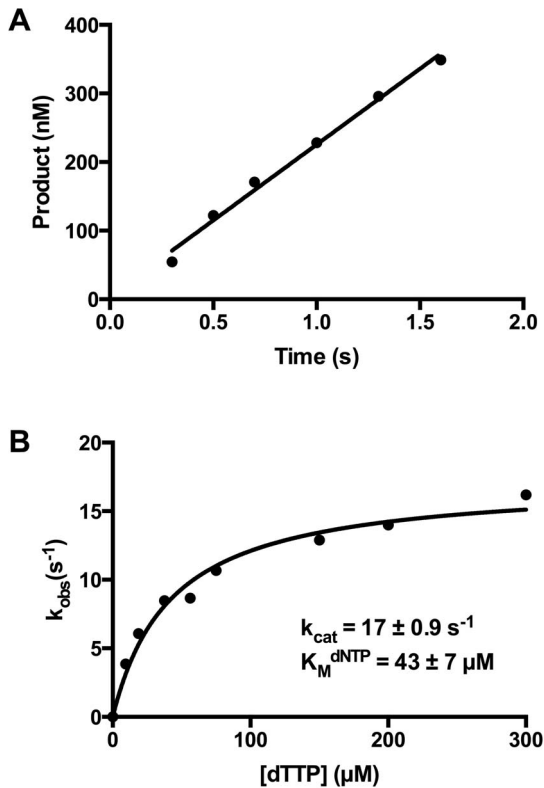

**Figure 5. Steady-state kinetic analysis of *Sau*-PolC- $\Delta$ N $\Delta$ Exo.** Primer extension assays were performed by adding dTTP (final concentration range 9.38 to 300  $\mu$ M) to a final concentrations of 2.5  $\mu$ M p/t DNA and 16.5 nM active *Sau*-PolC- $\Delta$ N $\Delta$ Exo. The reactions were quenched at different time intervals with 250 mM EDTA. (A) A typical time course of primer extension followed during the steady-state kinetic assays (final [dTTP] was 300  $\mu$ M). The concentration of primer extended was plotted against time and fit to the steady-state equation (Equation 1). (B) Michaelis-Menten plot for *Sau*-PolC- $\Delta$ N $\Delta$ Exo. The observed rates of primer extension were plotted as a function of the dTTP concentration. The resulting plot was fit to the Michaelis-Menten equation (Equation 2). From the fit, steady-state rate constant ( $k_{cat}$ ) was calculated to be  $17 \pm 1$   $s^{-1}$  and Michaelis constant for dNTP ( $K_M^{dNTP}$ ) was determined to be  $43 \pm 7$   $\mu$ M. doi:10.1371/journal.pone.0063489.g005

### Nucleotide Binding Affinity

Primer extension assays were again performed under burst conditions to determine the apparent  $K_D^{dNTP}$  and  $k_{pol}$ . For these assays the final concentrations of active *Sau*-PolC- $\Delta$ N $\Delta$ Exo and p/t DNA were 804 nM and 50 nM respectively. The concentration of dTTP was varied from 1.17 to 100  $\mu$ M and a representative range of data is shown in Figure 8A. Rates of the fast phase ( $k_1$ ), obtained by fitting the time course to the full burst equation, were plotted against [dTTP] and the data were fit to a hyperbolic equation (Equation 6). From the fit, the apparent  $K_D^{dNTP}$  was determined to be  $3.2 \pm 0.9$   $\mu$ M and  $k_{pol}$  was  $180 \pm 9$   $s^{-1}$  (Figure 8B). Although these parameters were reasonable compared to other replicative polymerases, the overall fit to the data was not good ( $R^2$  of 0.75), primarily because the observed rates for lower nucleotide concentrations did not match well with the rates predicted by the hyperbolic equation (Figure 8C). The deviation of the observed nucleotide incorporation rates appeared to be due to the lower amplitudes of the fast phase at low nucleotide concentrations.

### Dependence of Active Enzyme-DNA Binary Complex on [dNTP]

Typically, bond formation (Figure 2, step 3) is irreversible, because pyrophosphate release (Figure 2, step 4) is fast, and the binding of the incoming dNTP is a rapid equilibrium process [21]. Hence there is no equilibrium between dNTP binding (Figure 2, step 2) and bond formation. Therefore, an increase in the concentration of the incoming dNTP does not influence the concentration of the preformed active enzyme · DNA binary complex that gets converted to product before turnover ( $[ED]_A$ ). This is observed as the lack of correlation in a plot of  $[ED]_A$  versus [dTTP]. Upon closer inspection of our data, however, we observed that  $[ED]_A$  obtained from the burst amplitude of the fast phase was dependent on the dTTP concentration, saturating at higher concentrations (Figure 8D) and fit well ( $R^2$  of 0.98) to a hyperbolic equation (Equation 7). From the fit, the apparent  $K_D^{dNTP}$  was found to be  $4.0 \pm 0.3$   $\mu$ M and the maximum concentration of  $[ED]_A$  ( $[ED]_A^{max}$ ) was  $36 \pm 0.5$  nM. This dNTP concentration dependence of  $[ED]_A$  suggests that bond formation is reversible (Figure 2, step 3) and is in equilibrium with ground state dNTP binding (Figure 2, step 2). As a result,  $[ED]_A$  increases when increasing concentrations of dTTP drive the equilibrium towards product formation. This observation suggests that there is a slow step after catalysis but prior to PPi release that allows chemistry to be reversible.

We therefore turned to using KinTek Explorer to calculate the kinetic parameters for the forward and reverse steps of chemistry accurately by numerical integration, and also to define a rate constant for the slow step immediately after chemistry. The enzymatic pathway of *Sau*-PolC- $\Delta$ N $\Delta$ Exo was simulated through a three-step mechanism: (1) dNTP binding to the polymerase · DNA binary complex, (2) dNTP incorporation, and (3) PPi release (Figure 9A). We have used this model for simplicity because, for chemistry to be reversible, PPi must be positioned at the active site to cause pyrophosphorolysis. Although PPi release is modeled as a simple binding interaction, it is likely that this step in the pathway also involves a conformational change of the polymerase-DNA complex. Thus, it is important to keep in mind that the kinetic parameters defined for PPi release may actually describe more than one elementary step that occurs immediately after chemistry. Since the ternary complex is stable, as shown in Figure 7A, we assumed that DNA would not dissociate from the enzyme when either dNTP or PPi were bound. For the simulation, the rate of dNTP association was considered to be limited by diffusion and accordingly the second order association rate constant was fixed at  $100$   $\mu$ M $^{-1}$  $s^{-1}$ . Also, PPi release was assumed to be irreversible, since the concentration of PPi in solution during the reaction period would be negligible. The experimentally determined  $K_D^{DNA}$  and DNA release rate ( $k_{off}$ ) from the binary complex were used to determine the concentration of the preformed *Sau*-PolC- $\Delta$ N $\Delta$ Exo · p/t DNA complex and the second order association rate constant for the formation of the binary complex. The simulated curves were generated through iterative steps that used kinetic parameters obtained from nonlinear regression as initial values.

Simulated curves were superimposed on the representative time course data shown in Figure 8A (Figure 9B). Through numerical integration, the rate of chemistry was determined to be  $\sim 220$   $s^{-1}$  for the forward reaction and  $\sim 110$   $s^{-1}$  for the reverse reaction, yielding a net maximum rate ( $k_{pol}$ ) of  $\sim 330$   $s^{-1}$ . Also, the rate of pyrophosphate release following chemistry was determined to be  $26$   $s^{-1}$  and the  $K_D^{dNTP}$  was  $7.5$   $\mu$ M. From 3-D confidence contour analysis, all the calculated parameters appeared to be well constrained by the data (Figure 9C). From the simulation, the

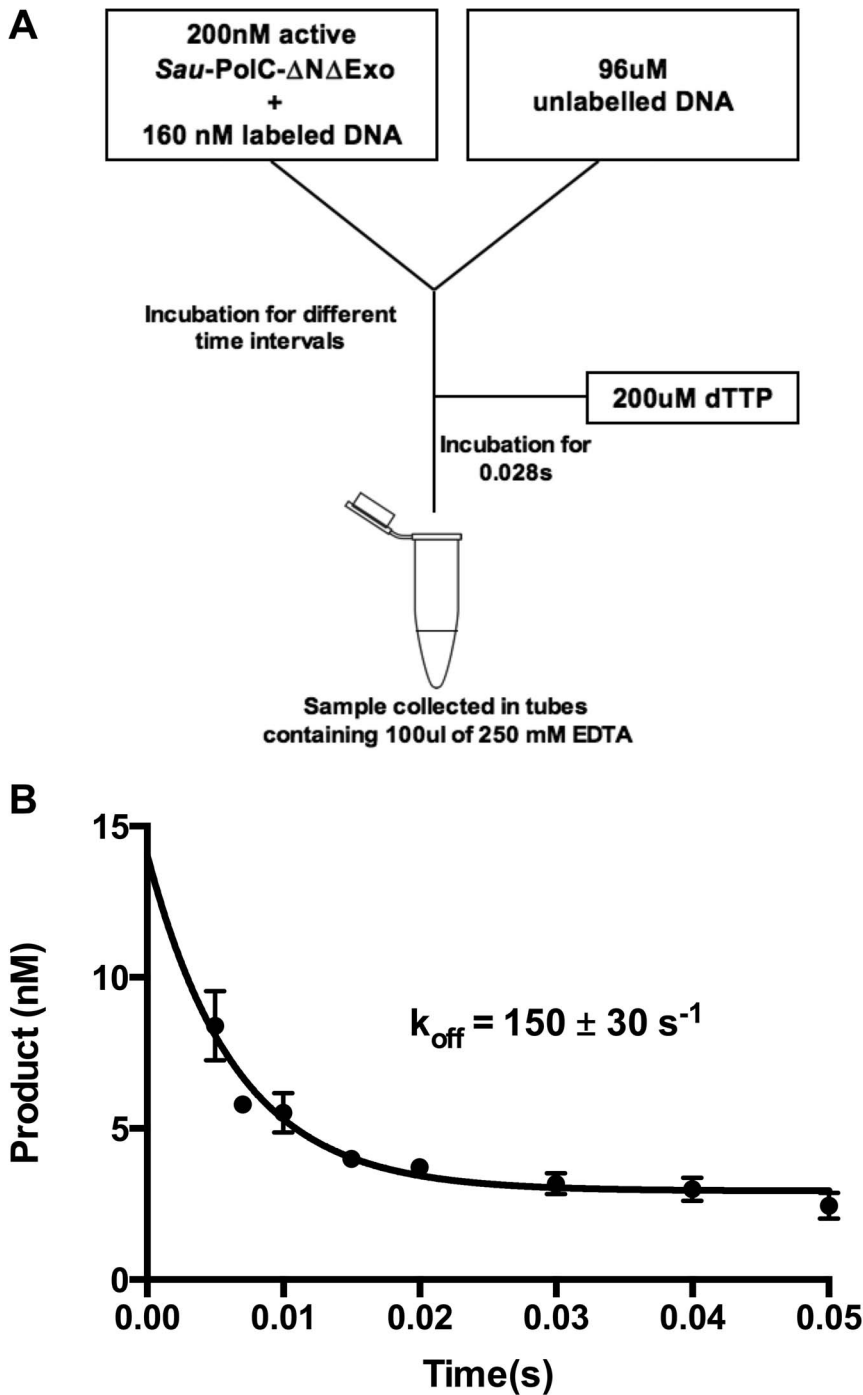

**Figure 6. Determination of the DNA dissociation rate from polymerase · DNA binary complex ( $k_{off}$ ).** (A) Schematic representation of the experimental procedure. (B) Plot of product formed vs time. The data were fit to a single exponential equation (Equation 3). The rate of decrease in product formation (which is equivalent to the rate of dissociation of p/t DNA from *Sau*-PolC- $\Delta$ N $\Delta$ Exo · p/t DNA binary complex ( $k_{off}$ )) was  $150 \pm 30 \text{ s}^{-1}$ . doi:10.1371/journal.pone.0063489.g006

calculated rate of PPI release is much lower than the calculated rate of catalysis and is very close to the  $k_{cat}$  of *Sau*-PolC- $\Delta$ N $\Delta$ Exo, suggesting that PPI release (or a conformational change required for PPI release) may govern the steady-state rate.

## Discussion

We have determined the minimal kinetic pathway (Figure 10) for *Sau*-PolC- $\Delta$ N $\Delta$ Exo and defined parameters for individual steps within the pathway using both steady-state and pre-steady-state kinetic approaches. The kinetic steps fit the same pathway used by other polymerases, but PolC exhibits several distinguishing features (Table 1). To our knowledge, this is the first comprehen-



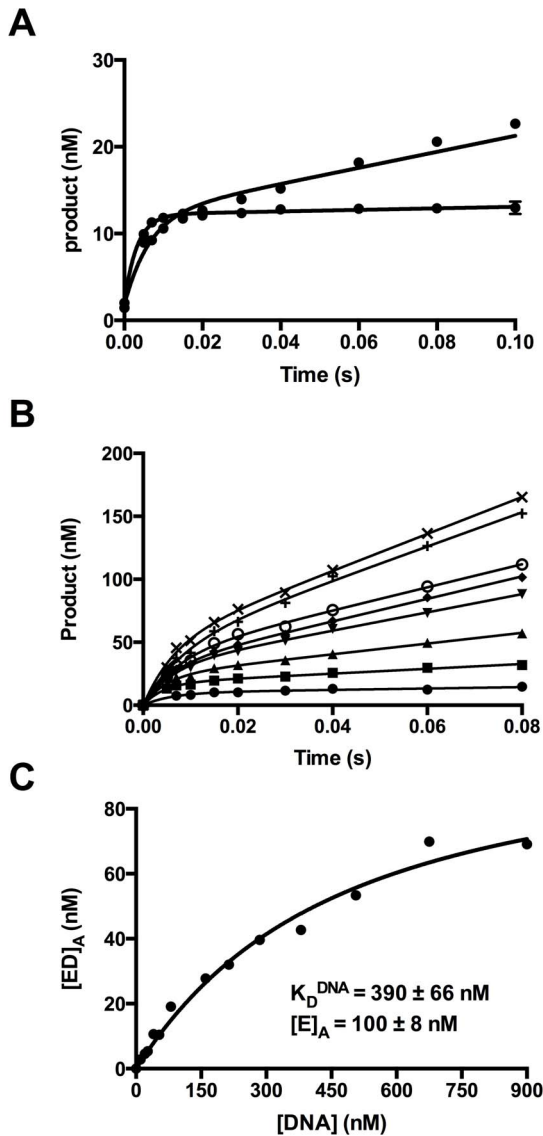

**Figure 7. Pre-steady-state kinetics and active site titration of *Sau*-PolC- $\Delta$ N $\Delta$ Exo.** (A) A time course of primer extension under pre-steady-state condition in the presence ( $\bullet$ ) and absence ( $\blacklozenge$ ) of unlabelled p/t DNA acting as an enzyme trap. 35  $\mu$ M dTTP (with or without 48  $\mu$ M of unlabelled p/t DNA) was added to 150 nM *Sau*-PolC- $\Delta$ N $\Delta$ Exo (corresponding to an active *Sau*-PolC- $\Delta$ N $\Delta$ Exo concentration of 100 nM) and 80 nM p/t DNA (all concentrations are final). In the absence of the trap, the time course was biphasic in nature and the data were fit to the full burst equation (Equation 4). The rate of the fast phase was  $150 \pm 30 \text{ s}^{-1}$  and that of the slower phase was  $8.5 \pm 1 \text{ s}^{-1}$ ,  $[\text{ED}]_A$  was found to be  $12 \pm 1 \text{ nM}$ . In the presence of the trap, the time course was monophasic and the data were fit to a single exponential equation, with a rate of  $300 \pm 14 \text{ s}^{-1}$  and an amplitude of  $11.5 \pm 0.5 \text{ nM}$ . The data can also be fit equally well to the full burst equation, but the data were not sufficient to justify using the more complex model. (B) A representative set of primer extension assays performed during active site titration. Time resolved primer extension assays were performed using 150 nM *Sau*-PolC- $\Delta$ N $\Delta$ Exo, 1 mM dTTP and varying concentrations of p/t DNA ( $\bullet$  40 nM,  $\blacksquare$  80 nM,  $\blacklozenge$  160.1 nM,  $\blacklozenge$  284.76 nM,  $\blacklozenge$  379.69 nM,  $\circ$  506.25 nM,  $\blacklozenge$  675 nM and  $\times$  900 nM). The concentration of extended primer was plotted versus time and data were fit to the full burst equation (Equation 4). For ease of understanding, the background primer extension has been deducted from each time course. (C) A plot of the concentrations of pre-formed active enzyme-DNA complex getting converted to product before turnover ( $[\text{ED}]_A$ ) versus DNA concentration was fit to a quadratic equation (Equation 5).  $K_D^{\text{DNA}}$  was

determined to be  $390 \pm 70 \text{ nM}$  and the concentration of active *Sau*-PolC- $\Delta$ N $\Delta$ Exo was found to be  $100 \pm 8 \text{ nM}$ . doi:10.1371/journal.pone.0063489.g007

sive kinetic study of the catalytic subunit of the bacterial replisome. As described below, our findings provide deeper insight into several activities of the bacterial C-family polymerases that have been previously observed.

Our data show that *Sau*-PolC- $\Delta$ N $\Delta$ Exo is a fast enzyme, with a maximum nucleotide incorporation rate  $k_{\text{pol}}$  of  $330 \text{ s}^{-1}$ , but also binds DNA weakly, with a  $K_D^{\text{DNA}}$  of 390 nM, and dissociates rapidly from DNA, with a  $k_{\text{off}}$  of  $150 \text{ s}^{-1}$  when dNTP is not bound. These parameters indicate that *Sau*-PolC- $\Delta$ N $\Delta$ Exo would have a very low processivity, which is consistent with previous reports about C-family replicative polymerases being non-processive in the absence of accessory protein factors like the  $\beta$ -clamp [12,35]. Furthermore, weak DNA binding is important for rapid, high fidelity DNA synthesis by bacterial replicative polymerases, as evidenced by an *E. coli* DnaE mutant, *dnaE173*, which has a single amino acid substitution of E612K [36]. The mutant enzyme binds DNA more tightly and simultaneously becomes more processive (even in the absence of clamp), but also shows a reduced rate of DNA elongation and is more error-prone [36]. The data we have obtained for *Sau*-PolC- $\Delta$ N $\Delta$ Exo are also consistent with the little kinetic data previously available for full-length C-family polymerases [37–39].

The most surprising result from these studies is that nucleotide binding is in equilibrium with the chemical step of the phosphoryl transfer reaction. For this to be the case, the step immediately after chemistry must be slow enough so that there is a build up of the enzyme-DNA-PPi complex resulting from chemistry, thus driving the reverse of nucleotide addition (pyrophosphorolysis). We hypothesize that PPi release after catalysis, or a conformational change that precedes PPi release, might act as a rate-limiting step in the catalytic cycle, allowing the polymerase to retain a conformation favorable to reversal of bond formation. From simulating the reaction mechanism, the rate of this slow step was calculated to be  $26 \text{ s}^{-1}$  and is likely to be the main determinant of  $k_{\text{cat}}$  ( $17 \text{ s}^{-1}$ ).

Equilibrium between chemistry and ground state dNTP binding has not, to our knowledge, been observed previously for standard dNTPs, but has been reported for mitochondrial DNA polymerase gamma incorporating the damaged nucleotide 8-oxo-dGTP and the nucleotide analog AZT-TP [40–42]. Since this was not observed with standard nucleotides, it was proposed to be a mechanism for removing non-natural nucleotides. If the slow step after chemistry plays the same role for PolC, it could provide a rudimentary proofreading function.

Previous studies show that the sliding  $\beta$ -clamp processivity factor increases not only the processivity of the C-family polymerases but also the intrinsic rate of nucleotide incorporation. *E. coli* pol III core, for example, synthesizes DNA at a rate of 20 nt/sec, but the rate increases to at least 500 nt/sec in the presence of clamp [43,44]. Similarly, the intrinsic nucleotide incorporation rate of *S. aureus* PolC on primed circular single-stranded DNA was estimated to be  $\sim 80 \text{ nt/sec}$ , and this increased to  $\sim 480 \text{ nt/sec}$  in the presence of the sliding clamp [12]. Association with processivity factor, however, does not always stimulate the rate of nucleotide incorporation in this way. The processivity of *E. coli* pol II increases from 5 to  $\sim 1600$  nucleotides in the presence of  $\beta$ -clamp, but nucleotides are incorporated at a rate of  $\sim 30 \text{ nt/sec}$  in both cases [45]. These observations led to the proposal that  $\beta$ -clamp not only increases the processivity of the

**Table 1.** Comparison of kinetic parameters of different polymerases.

| Polymerase                                                             | Family   | $K_D^{DNA}$ (nM) | $K_D^{dNTP}$ ( $\mu$ M) | $k_{pol}$ ( $s^{-1}$ ) | $k_{off}^\dagger$ ( $s^{-1}$ ) | References |
|------------------------------------------------------------------------|----------|------------------|-------------------------|------------------------|--------------------------------|------------|
| <i>Sau-PolC-<math>\Delta</math>N<math>\Delta</math>Exo</i> (observed)  | <b>C</b> | <b>390</b>       | <b>4</b>                | <b>180</b>             | <b>150</b>                     | –          |
| <i>Sau-PolC-<math>\Delta</math>N<math>\Delta</math>Exo</i> (simulated) | <b>C</b> | –                | <b>7.5</b>              | <b>330</b>             | –                              | –          |
| Pol I (Klenow)                                                         | A        | 5                | 5.5                     | 50                     | 0.06                           | [24]       |
| <i>T7DNA Polymerase</i>                                                | A        | (18)             | (18)                    | (287)                  | (0.2)                          | [25]       |
| <i>E. coli</i> Pol II                                                  | B        | 21               | 4.4                     | 13                     | 0.05                           | [48]       |
| <i>Mammalian Pol<math>\delta</math></i>                                | B        | 300              | –                       | 7                      | 0.005                          | [49]       |
|                                                                        |          | (64)             | (0.93)                  | (21)                   | (0.006)                        |            |
| <i>Yeast Pol<math>\delta</math></i>                                    | B        | 30               | 24                      | 1                      | 0.045                          | [50]       |
| <i>Human mitochondrial Pol<math>\gamma</math></i>                      | B        | 39               | 14                      | 3.5                    | 0.03                           | [51,52]    |
|                                                                        |          | (9.9)            | (0.78)                  | (45)                   | (0.02)                         |            |
| Pol $\beta$                                                            | X        | 49               | 110                     | 10                     | 0.3                            | [53]       |
| <i>E. coli</i> Pol IV                                                  | Y        | 50               | 441                     | 12                     | 0.18                           | [54]       |
|                                                                        |          | –                | (51)                    | (22)                   | (0.03)                         |            |

Data obtained from this study are highlighted in bold. Replicative polymerases are shown in italics. Values shown in parentheses were measured in the presence of the corresponding processivity factor.

<sup>†</sup>For all DNA polymerases shown here except for *Sau-PolC- $\Delta$ N $\Delta$ Exo*  $k_{off}$  is equivalent to  $k_{cat}$ .  
doi:10.1371/journal.pone.0063489.t001

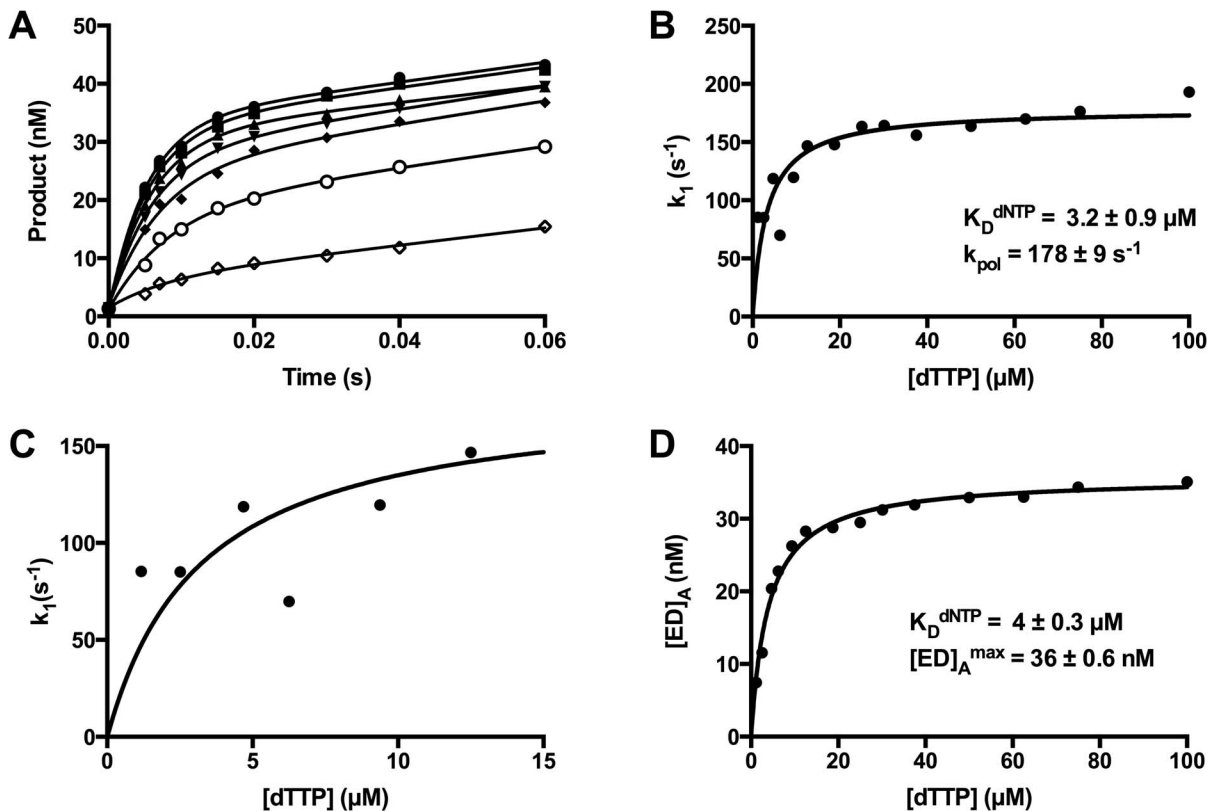

**Figure 8. Determination of  $K_D^{dNTP}$  of *Sau-PolC- $\Delta$ N $\Delta$ Exo*.** (A) A representative set of primer extension assays performed during  $K_D^{dNTP}$  determination for *Sau-PolC- $\Delta$ N $\Delta$ Exo*. The reactions were performed with 804 nM active *Sau-PolC- $\Delta$ N $\Delta$ Exo*, 50 nM p/t DNA and various concentrations of dTTP ( $\diamond$  1.17  $\mu$ M,  $\circ$  4.69  $\mu$ M,  $\blacklozenge$  9.4  $\mu$ M,  $\blacktriangledown$  18.75  $\mu$ M,  $\blacktriangle$  30.14  $\mu$ M,  $\blacksquare$  50  $\mu$ M and  $\bullet$  75  $\mu$ M). The concentrations of extended primers were plotted against time and the plots were fit to the full burst equation (Equation 4). (B) A plot of the observed rates of the fast phase ( $k_1$ ) versus [dTTP]. The data were fit to a hyperbolic equation (Equation 6). From the fit,  $K_D^{dNTP}$  was determined to be  $3.2 \pm 0.9 \mu$ M and maximum rate of the burst ( $k_{pol}$ ) was found to be  $178 \pm 9 s^{-1}$ .  $R^2$  value for this fit was 0.75. (C) An enlarged view of panel (B) of up to 15  $\mu$ M of [dTTP]. (D) A plot of  $[ED]_A$  versus [dTTP] was fit to a hyperbolic equation (Equation 7). From the fit,  $K_D^{dNTP}$  was found to be  $4.0 \pm 0.3 \mu$ M and the maximum  $[ED]_A$  was  $36 \pm 0.6$  nM.  $R^2$  value for this fit was 0.98.

doi:10.1371/journal.pone.0063489.g008

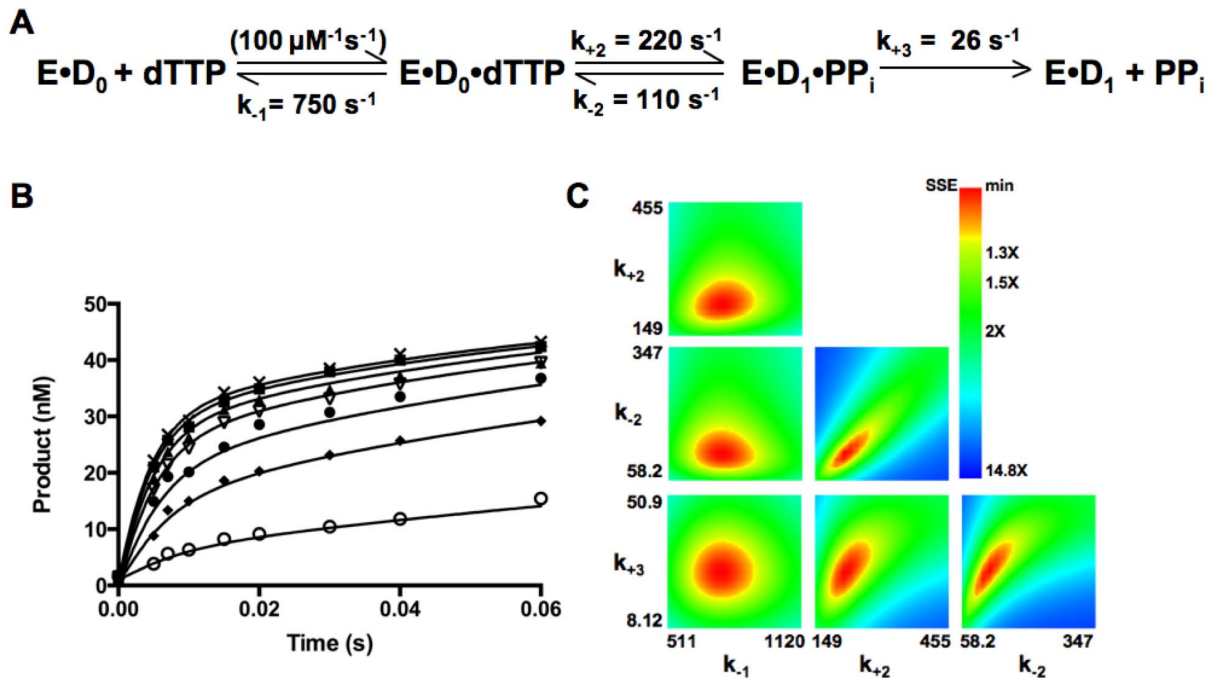

**Figure 9. Simulation of kinetic pathway of *Sau*-PolC- $\Delta$ N $\Delta$ Exo.** (A) The three-step reaction mechanism used for the simulation. Values obtained for the different rate constants are shown alongside the appropriate step. Rate of dNTP association to the E·D<sub>0</sub> binary complex was assumed to be diffusion limited and accordingly the second order rate constant for this step was fixed at 100  $\mu\text{M}^{-1}\text{s}^{-1}$ . (B) Simulated curves generated for the representative dataset shown in Figure 8A superimposed on the raw data (concentrations of dTTP shown are  $\circ$  1.17  $\mu\text{M}$ ,  $\blacklozenge$  4.69  $\mu\text{M}$ ,  $\bullet$  9.4  $\mu\text{M}$ ,  $\nabla$  18.75  $\mu\text{M}$ ,  $\blacktriangle$  30.14  $\mu\text{M}$ ,  $\blacksquare$  50  $\mu\text{M}$  and  $\times$  75  $\mu\text{M}$ ). (C) 3-D confidence contours for the various rate constants determined from the simulation. For each case the search was carried out up to a sum of squares error (SSE) that is 2-fold higher than the minimum SSE. The upper and lower limits of each parameter were determined using an SSE threshold of 1.2. doi:10.1371/journal.pone.0063489.g009

C-family replicative polymerases, but that it also increases the rate of a limiting step in the catalytic cycle [12].

Our kinetic data suggest a mechanism by which  $\beta$ -clamp may increase the rate of nucleotide incorporation: by increasing the rate of the slow step immediately after chemistry.  $\beta$ -clamp increases processivity by encircling the DNA duplex and eliminating DNA dissociation as a step in the reaction pathway. However, since *Sau*-PolC- $\Delta$ N $\Delta$ Exo has a slow kinetic step (26  $\text{s}^{-1}$ ) between catalysis and DNA dissociation, nucleotide incorporation would not be stimulated if this was the only step in the reaction pathway that was

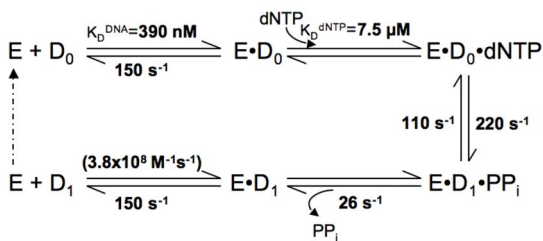

**Figure 10. Minimal enzymatic pathway for *Sau*-PolC- $\Delta$ N $\Delta$ Exo.** The kinetic parameters determined are shown alongside the corresponding steps of the pathway.  $K_D^{\text{dNTP}}$ , forward and reverse rates of chemistry and rate of PPi release were derived from simulation of the reaction pathway. The rate of enzyme-DNA association ( $k_{\text{on}}$ ) is calculated from the  $K_D^{\text{DNA}}$  and  $k_{\text{off}}$  using the relation that  $K_D^{\text{DNA}} = k_{\text{off}}/k_{\text{on}}$ . It should be noted that although nucleotide binding and PPi release are each shown as single steps, they may in fact be comprised of more than one elementary step, such as a conformational change in the polymerase accompanying substrate binding and product release. doi:10.1371/journal.pone.0063489.g010

changed. We hypothesize that  $\beta$ -clamp binding to PolC would speed up the rate of the slow step after chemistry, perhaps by stimulating PPi release. If the step immediately after chemistry was no longer rate limiting, we would expect the rate of processive DNA synthesis to increase to the rate of chemistry (330  $\text{s}^{-1}$ ).

Overall, the results presented here establish the kinetic foundation for future structure-function studies of the C-family polymerases by allowing a quantitative comparison of enzyme activities. Structural studies indicate that DnaE and PolC are members of the  $\beta$ -nucleotidyl transferase superfamily, making the bacterial replicative polymerases more closely related to eukaryotic repair polymerases (such as pol  $\beta$  from the X-family) than to eukaryotic or archaeal replicative polymerases [16–19]. Some questions that can now be addressed include: How do the C-family polymerases incorporate nucleotides more than 100-fold faster than the X-family polymerases? What contributes to the substantial differences in substrate binding between the two polymerase families? How do the replicative C-family polymerases achieve such a high fidelity of DNA synthesis? PolC has been identified as a novel drug target for antibiotics against Gram-positive bacteria [46,47]. Beyond increasing our fundamental understanding of bacterial DNA replication, addressing these questions may help in identifying novel features of PolC that could help in developing new antibiotics against Gram-positive pathogens.

**Acknowledgments**

We thank Thale Jarvis for the clone of *S. aureus* PolC, Ken Johnson for advice on the kinetic simulations, Karen Chave for assistance optimizing protein expression, and Ryan Wilson for careful proofreading of the manuscript. We acknowledge the use of the Wadsworth Center’s Protein Expression Core.

## Author Contributions

Conceived and designed the experiments: IL PM JDP. Performed the experiments: IL PM. Analyzed the data: IL PM JDP. Wrote the paper: IL PM JDP.

## References

- Filee J, Forterre P, Sen-Lin T, Laurent J (2002) Evolution of DNA polymerase families: evidences for multiple gene exchange between cellular and viral proteins. *J Mol Evol* 54: 763–773.
- Ito J, Braithwaite DK (1991) Compilation and alignment of DNA polymerase sequences. *Nucleic Acids Res* 19: 4045–4057.
- Huang YP, Ito J (1999) DNA polymerase C of the thermophilic bacterium *Thermus aquaticus*: classification and phylogenetic analysis of the family C DNA polymerases. *J Mol Evol* 48: 756–769.
- Breier AM, Weier H-UG, Cozzarelli NR (2005) Independence of replisomes in *Escherichia coli* chromosomal replication. *Proc Natl Acad Sci U S A* 102: 3942–3947.
- Bruck I, Georgescu RE, O'Donnell M (2005) Conserved interactions in the *Staphylococcus aureus* DNA PolC chromosome replication machine. *J Biol Chem* 280: 18152–18162.
- Bruck I, O'Donnell M (2000) The DNA replication machine of a gram-positive organism. *J Biol Chem* 275: 28971–28983.
- Bruck I, Yuzhakov A, Yurieva O, Jeruzalmi D, Skangalis M, et al. (2002) Analysis of a multicomponent thermostable DNA polymerase III replicase from an extreme thermophile. *J Biol Chem* 277: 17334–17348.
- Bullard JM, Pritchard AE, Song M-S, Glover BP, Wiczczonek A, et al. (2002) A three-domain structure for the delta subunit of the DNA Polymerase III holoenzyme delta domain III binds delta-prime and assembles into the DnaX complex. *J Biol Chem* 277: 13246–13256.
- Dohrmann PR, Manhart CM, Downey CD, McHenry CS (2011) The rate of polymerase release upon filling the gap between Okazaki fragments is inadequate to support cycling during lagging strand synthesis. *J Mol Biol* 414: 15–27.
- Downey CD, Crooke E, McHenry CS (2011) Polymerase chaperoning and multiple ATPase sites enable the *E. coli* DNA polymerase III holoenzyme to rapidly form initiation complexes. *J Mol Biol* 412: 340–353.
- Georgescu RE, Kurth I, O'Donnell ME (2012) Single-molecule studies reveal the function of a third polymerase in the replisome. *Nat Struct Mol Biol* 19: 113–116.
- Klemperer N, Zhang D, Skangalis M, O'Donnell M (2000) Cross-utilization of the beta sliding clamp by replicative polymerases of evolutionary divergent organisms. *J Biol Chem* 275: 26136–26143.
- McInerney P, Johnson A, Katz F, O'Donnell M (2007) Characterization of a triple DNA polymerase replisome. *Mol Cell* 27: 527–538.
- Sanders GM, Dallmann HG, McHenry CS (2010) Reconstitution of the *B. subtilis* replisome with 13 proteins including two distinct replicases. *Mol Cell* 37: 273–281.
- Yao NY, Georgescu RE, Finkelstein J, O'Donnell ME (2009) Single-molecule analysis reveals that the lagging strand increases replisome processivity but slows replication fork progression. *Proc Natl Acad Sci U S A* 106: 13236–13241.
- Bailey S, Wing RA, Steitz TA (2006) The structure of *T. aquaticus* DNA polymerase III is distinct from eukaryotic replicative DNA polymerases. *Cell* 126: 893–904.
- Evans RJ, Davies DR, Bullard JM, Christensen J, Green LS, et al. (2008) Structure of PolC reveals unique DNA binding and fidelity determinants. *Proc Natl Acad Sci U S A* 105: 20695–20700.
- Lamers MH, Georgescu RE, Lee SG, O'Donnell M, Kuriyan J (2006) Crystal structure of the catalytic alpha subunit of *E. coli* replicative DNA polymerase III. *Cell* 126: 881–892.
- Wing RA, Bailey S, Steitz TA (2008) Insights into the replisome from the structure of a ternary complex of the DNA polymerase III alpha-subunit. *J Mol Biol* 382: 859–869.
- Johnson A, O'Donnell M (2005) Cellular DNA replicases: components and dynamics at the replication fork. *Annu Rev Biochem* 74: 283–315.
- Johnson KA (1993) Conformational coupling in DNA polymerase fidelity. *Annu Rev Biochem* 62: 685–713.
- Johnson KA (2010) The kinetic and chemical mechanism of high-fidelity DNA polymerases. *Biochim Biophys Acta* 1804: 1041–1048.
- Joyce CM (2010) Techniques used to study the DNA polymerase reaction pathway. *Biochim Biophys Acta* 1804: 1032–1040.
- Kuchta RD, Mizrahi V, Benkovic PA, Johnson KA, Benkovic SJ (1987) Kinetic mechanism of DNA polymerase I (Klenow). *Biochemistry* 26: 8410–8417.
- Patel SS, Wong I, Johnson KA (1991) Pre-steady-state kinetic analysis of processive DNA replication including complete characterization of an exonuclease-deficient mutant. *Biochemistry* 30: 511–525.
- Doublet S, Tabor S, Long AM, Richardson CC, Ellenberger T (1998) Crystal structure of a bacteriophage T7 DNA replication complex at 2.2 Å resolution. *Nature* 391: 251–258.
- Li Y, Korolev S, Waksman G (1998) Crystal structures of open and closed forms of binary and ternary complexes of the large fragment of *Thermus aquaticus* DNA polymerase I: structural basis for nucleotide incorporation. *EMBO J* 17: 7514–7525.
- Joyce CM, Potapova O, Delucia AM, Huang X, Basu VP, et al. (2008) Fingers-closing and other rapid conformational changes in DNA polymerase I (Klenow fragment) and their role in nucleotide selectivity. *Biochemistry* 47: 6103–6116.
- Rothwell PJ, Mitaksov V, Waksman G (2005) Motions of the fingers subdomain of Klentaq1 are fast and not rate limiting: implications for the molecular basis of fidelity in DNA polymerases. *Mol Cell* 19: 345–355.
- Tsai YC, Johnson KA (2006) A new paradigm for DNA polymerase specificity. *Biochemistry* 45: 9675–9687.
- Kellinger MW, Johnson KA (2010) Nucleotide-dependent conformational change governs specificity and analog discrimination by HIV reverse transcriptase. *Proc Natl Acad Sci U S A* 107: 7734–7739.
- Johnson KA, Simpson ZB, Blom T (2009) FitSpace explorer: an algorithm to evaluate multidimensional parameter space in fitting kinetic data. *Anal Biochem* 387: 30–41.
- Johnson KA, Simpson ZB, Blom T (2009) Global kinetic explorer: a new computer program for dynamic simulation and fitting of kinetic data. *Anal Biochem* 387: 20–29.
- Johnson KA (1992) 1 Transient-State Kinetic Analysis of Enzyme Reaction Pathways. In: David SS, editor. *The Enzymes*: Academic Press. 1–61.
- Fay PJ, Johanson KO, McHenry CS, Bambara RA (1981) Size classes of products synthesized processively by DNA polymerase III and DNA polymerase III holoenzyme of *Escherichia coli*. *J Biol Chem* 256: 976–983.
- Yanagihara F, Yoshida S, Sugaya Y, Maki H (2007) The dnaE173 mutator mutation confers on the alpha subunit of *Escherichia coli* DNA polymerase III a capacity for highly processive DNA synthesis and stable binding to primer/template DNA. *Genes Genet Syst* 82: 273–280.
- Burrows JA, Goward CR (1992) Purification and properties of DNA polymerase from *Bacillus caldotenax*. *Biochem J* 287 (Pt 3): 971–977.
- Kim DR, Pritchard AE, McHenry CS (1997) Localization of the active site of the alpha subunit of the *Escherichia coli* DNA polymerase III holoenzyme. *J Bacteriol* 179: 6721–6728.
- Shapiro A, Rivin O, Gao N, Hajec L (2005) A homogeneous, high-throughput fluorescence resonance energy transfer-based DNA polymerase assay. *Anal Biochem* 347: 254–261.
- Hanes JW, Johnson KA (2007) A novel mechanism of selectivity against AZT by the human mitochondrial DNA polymerase. *Nucleic Acids Res* 35: 6973–6983.
- Hanes JW, Thal DM, Johnson KA (2006) Incorporation and replication of 8-oxo-deoxyguanosine by the human mitochondrial DNA polymerase. *J Biol Chem* 281: 36241–36248.
- Johnson AA, Ray AS, Hanes J, Suo Z, Colacino JM, et al. (2001) Toxicity of antiviral nucleoside analogs and the human mitochondrial DNA polymerase. *J Biol Chem* 276: 40847–40857.
- Studwell PS, O'Donnell M (1990) Processive replication is contingent on the exonuclease subunit of DNA polymerase III holoenzyme. *J Biol Chem* 265: 1171–1178.
- Maki H, Kornberg A (1985) The polymerase subunit of DNA polymerase III of *Escherichia coli*. II. Purification of the alpha subunit, devoid of nuclease activities. *J Biol Chem* 260: 12987–12992.
- Bonner CA, Stukenberg PT, Rajagopalan M, Eritja R, O'Donnell M, et al. (1992) Processive DNA synthesis by DNA polymerase II mediated by DNA polymerase III accessory proteins. *J Biol Chem* 267: 11431–11438.
- Standish AJ, Salim AA, Capon RJ, Morona R (2013) Dual inhibition of DNA polymerase PolC and protein tyrosine phosphatase CpsB uncovers a novel antibiotic target. *Biochem Biophys Res Commun* 430: 167–172.
- Yang F, Dicker IB, Kurilla MG, Pompliano DL (2002) PolC-type polymerase III of *Streptococcus pyogenes* and its use in screening for chemical inhibitors. *Anal Biochem* 304: 110–116.
- Lowe LG, Guengerich FP (1996) Steady-state and pre-steady-state kinetic analysis of dNTP insertion opposite 8-oxo-7,8-dihydroguanine by *Escherichia coli* polymerases I exo- and II exo. *Biochemistry* 35: 9840–9849.
- Einolf HJ, Guengerich FP (2001) Fidelity of nucleotide insertion at 8-oxo-7,8-dihydroguanine by mammalian DNA polymerase delta. Steady-state and pre-steady-state kinetic analysis. *J Biol Chem* 276: 3764–3771.
- Dieckman LM, Johnson RE, Prakash S, Washington MT (2010) Pre-steady state kinetic studies of the fidelity of nucleotide incorporation by yeast DNA polymerase delta. *Biochemistry* 49: 7344–7350.
- Graves SW, Johnson AA, Johnson KA (1998) Expression, purification, and initial kinetic characterization of the large subunit of the human mitochondrial DNA polymerase. *Biochemistry* 37: 6050–6058.
- Johnson AA, Tsai Y, Graves SW, Johnson KA (2000) Human mitochondrial DNA polymerase holoenzyme: reconstitution and characterization. *Biochemistry* 39: 1702–1708.

53. Werneburg BG, Ahn J, Zhong X, Hondal RJ, Kraynov VS, et al. (1996) DNA polymerase beta: pre-steady-state kinetic analysis and roles of arginine-283 in catalysis and fidelity. *Biochemistry* 35: 7041–7050.
54. Bertram JG, Bloom LB, O'Donnell M, Goodman MF (2004) Increased dNTP binding affinity reveals a nonprocessive role for *Escherichia coli* beta clamp with DNA polymerase IV. *J Biol Chem* 279: 33047–33050.
